1 **Effects of N-linked glycan of Lassa Virus Envelope Glycoprotein on the Immune Response**

2 Xueqin Zhu,<sup>a,b</sup> Yang Liu,<sup>a</sup> Jiao Guo,<sup>a,b</sup> Zonglin Wang,<sup>a,b</sup> Junyuan Cao,<sup>a,b</sup> Gengfu Xiao,<sup>a,b</sup> Wei

3 Wang<sup>a,b</sup>#

4 State Key Laboratory of Virology, Wuhan Institute of Virology, Center for Biosafety

5 Mega-Science, Chinese Academy of Sciences, Wuhan 430071, China<sup>a</sup>

6 University of the Chinese Academy of Sciences, Beijing 100049, China<sup>b</sup>

7 **Running Head:** Role of Glycan on GPC-mediated functions

8 **Key Words:** Lassa virus (LASV), glycoprotein complex (GPC), N-linked glycan, immune  
9 response

10 **Word Count (Abstract):** 221

11 **Word Count (Text):** 3481

12 # Address correspondence to Wei Wang, wangwei@wh.iov.cn

13

## 14 **Abstract**

15 Lassa virus (LASV) belongs to the *Mammarenavirus* genus (family Arenaviridae) and causes  
16 severe hemorrhagic fever in humans. The glycoprotein precursor (GPC) contains eleven  
17 N-linked glycans that play essential roles in GPC functionalities such as cleavage, transport,  
18 receptor recognition, epitope shielding, and immune response. We used three mutagenesis  
19 strategies to abolish the individual glycan chains on the GPC and found that all three mutations  
20 led to cleavage inefficiency on the 2<sup>nd</sup>, 5<sup>th</sup>, and 8<sup>th</sup> glycosylation motifs. To evaluate N to Q  
21 mutagenesis for further research, it was found that deletion of the 2<sup>nd</sup> and 8<sup>th</sup> glycans  
22 completely inhibited the infectivity. We further investigated the role of glycans on  
23 GPC-mediated immune response by DNA immunization of mice. Deletion of the individual 1<sup>st</sup>,  
24 3<sup>rd</sup>, 5<sup>th</sup> and 6<sup>th</sup> glycans significantly enhanced the proportion of effector CD4<sup>+</sup> cells, whereas  
25 deletion of the 1<sup>st</sup>, 2<sup>nd</sup>, 3<sup>rd</sup>, 4<sup>th</sup> 5<sup>th</sup>, 6<sup>th</sup>, and 9<sup>th</sup> glycans enhanced the proportion of CD8<sup>+</sup> effector  
26 T cells. Deletion of specific glycans improves the Th1-type immune response, and abolishment  
27 of glycan on GPC generally increases the antibody titer to the glycan-deficient GPC. However,  
28 the antibodies from either the mutant or WT GPC-immunized mice show little neutralization  
29 effect on wild-type LASV. The glycan residues on GPC provide an immune shield for the virus,  
30 and thus represent a target for the design and development of a vaccine.

31

## 32 **Importance**

33 At present, there are no Food and Drug Administration-approved drugs or vaccines specific for  
34 LASV. Similar to other enveloped viruses with a heavy glycan shield, the N-linked glycans of

35 LASV make it difficult for effector T cells and neutralization antibodies to access the  
36 glycoprotein epitope. In this study, we evaluated the effect of the individual glycan chains on  
37 GPC-mediated immune response, and found that deletion of the glycan improves the proportion  
38 of effector T cells, improving the Th1-type immune response, and increasing the antibody titer  
39 to the WT and mutant GPC, which may be beneficial to vaccine design and development.

40

## 41 **Introduction**

42 Lassa virus (LASV) belongs to genus *Mammarenavirus*, family *Bunyaviridae*. The natural  
43 reservoir of LASV is *Mastomys natalensis* in Africa, and humans are infected through direct  
44 contact with their excreta or exposure to the aerosol. Between 300,000 and 500,000 people are  
45 infected with LASV annually, and the mortality of hospitalized patients ranges from 20% to  
46 70%. The United States Centers for Disease Control and Prevention classifies the virus as a  
47 Category A bioterrorism agent, and there is currently no drug or vaccine approved by the Food  
48 and Drug Administration capable of treating or preventing Lassa fever.

49 The envelope glycoprotein complex (GPC) of LASV is sequentially cleaved by signal  
50 peptidases and subtilisin kexin isozyme-1 (SKI-1)/site-1 protease (SIP) enzyme during the  
51 maturation process to obtain the stable signal peptide (SSP), receptor-binding GP1, and  
52 envelope fusion protein GP2. *Mammarenavirus* GPC is a heavily glycosylated protein. It has  
53 been estimated that N-linked glycosylation accounts for nearly 30% of the total mass of LASV  
54 GPC (1-3). The LASV lineage IV Josiah strain is the most commonly used strain in the  
55 development of LASV vaccines. It has 11 N-glycosylation motifs (Asn-X-Thr/Ser, where X is

56 any amino acid except proline) on its GPC (Fig. 1A). These 11 N-linked glycans are distributed  
57 relatively evenly on the surface of the GPC in terms of spatial conformation, with seven glycans  
58 on GP1 and four on GP2. Glycans play critical roles in many biological functions associated  
59 with the GPC, such as cleavage, folding, receptor recognition, epitope shielding, and immune  
60 response (4). Investigation on hospitalized patients infected with LASV found that a small  
61 amount of neutralizing antibodies could be detected in only a few convalescents at a relatively  
62 late stage of disease course, and that the neutralizing power of these antibodies was relatively  
63 low (4-8). However, a previous study found that the cellular immune response plays a major  
64 role in immune defense against the LASV (9, 10). We hypothesized that in LASV, the large  
65 number of N-linked glycans on the surface of the virion shields important GPC epitopes, which  
66 adversely affects immune recognition of the virus and inhibits induction of a specific immune  
67 response, thereby making treatment of and rehabilitation from Lassa fever difficult. Therefore,  
68 studying the role of the 11 N-sugar chains on the GPC of LASV with regards to the host  
69 immune response will help identify the mechanisms of immune escape employed by the virus  
70 and facilitate subsequent development of effective vaccines or therapeutic antibodies.

71

## 72 **Results**

### 73 *Effects of N-glycosylation Modification on GPC Cleavage*

74 To investigate the influences of different mutations of the 11 glycosylation motifs upon GPC  
75 cleavage, the corresponding asparagine residues were individually mutated to glutamine or  
76 alanine, and the serine/tyrosine residues in the motif were mutated to alanine. Thus, 33

77 mutations were constructed, and western blotting was performed using antiserum against GP2.  
78 As shown in Fig. 1, all mutations of the N-glycan motifs on GP2 resulted in slight decreases  
79 (~2 kDa) in the molecular weight of the respective GP2 bands relative to the wild-type (WT)  
80 GP2 band.

81 Next, we determined the effect of the N-linked glycans on protease cleavage by testing for  
82 the presence of cleaved GP2. Disruption of the N-linked glycosylation motif by substitution of  
83 asparagine with the structurally similar glutamine on the 2<sup>nd</sup>, 4<sup>th</sup>, 5<sup>th</sup>, and 8<sup>th</sup> motifs  
84 (corresponding to N89Q, N109Q, N119Q, and N365Q) inhibited proteolytical processing, and  
85 those with deletions at the remaining seven motifs (corresponding to N79Q, N99Q, N167Q,  
86 N224Q, N373Q, N390Q, and N395Q) were unaffected (Fig. 1B). Similarly, disruption of the  
87 glycosylation motifs by substitution of asparagine with alanine on the 2<sup>nd</sup>, 4<sup>th</sup>, and 8<sup>th</sup> motifs  
88 (corresponding to N89A, N109A, and N365A) abolished proteolytical processing, and the  
89 mutations in the 5<sup>th</sup> and 9<sup>th</sup> (corresponding to N119A and N373A) exerted mild inhibition,  
90 whereas the other N to A mutations had no influence (Fig. 1C). Intriguingly, substitution of  
91 serine or threonine at the 8<sup>th</sup> glycosylation site with alanine (corresponding to S367A) abolished  
92 the GP1-GP2 cleavage, and the mutations in the 1<sup>st</sup>, 2<sup>nd</sup>, 5<sup>th</sup>, and 9<sup>th</sup> (corresponding to T81A,  
93 S91A, S121A, and T375A) exerted mild inhibition on the cleavage efficiency (Fig. 1D). It was  
94 shown that disrupting the glycosylation motifs by introducing different mutations led to  
95 differing results, which might be due to the changes of the residue per se, rather than the loss of  
96 the specific glycan. However, all three mutations led to a decrease in cleavage efficiency on the  
97 2<sup>nd</sup>, 5<sup>th</sup>, and 8<sup>th</sup> glycosylation motifs, suggesting that the 2<sup>nd</sup>, 5<sup>th</sup>, and 8<sup>th</sup> N-linked glycans were

98 indispensable for GP1-GP2 cleavage. Given the consistency in the results for the N to A and N  
99 to Q substitutions, and that the structures of N and Q are the most similar, we used the N to Q  
100 mutation for further research, which caused a minimal change to the spatial structure of LASV  
101 GPC while ensuring glycosylation-site mutation.

102

### 103 *Effects of N-glycosylation Modification on the infectivity of LASV Pseudotype Virus*

104 To evaluate the influence of the individual glycan on the pseudotype virus infectivity, we  
105 constructed the pseudotype viruses with the VSV backbone bearing the mutant GPC. The  
106 infection activities were evaluated in Vero cells (Fig. 2). Disruption of the N-linked glycans by  
107 the N to Q substitutions on the 2<sup>nd</sup>, 4<sup>th</sup>, 5<sup>th</sup>, and 8<sup>th</sup> glycosylation motifs led to a significant loss  
108 of LASVpv (LASV pseudovirus) infectivity when compared with LASVpv packaged with WT  
109 GPC. Deletion of the 2<sup>nd</sup> and 8<sup>th</sup> N-linked glycans completely inhibited the infectivity, and  
110 deletion of the 4<sup>th</sup> and 5<sup>th</sup> N-linked glycans led to partial inhibition. These results were in line  
111 with the protease cleavage results depicted above, indicating that efficient cleavage of  
112 premature GPC was a prerequisite for downstream function.

113

### 114 *Effects of N-glycosylation Modification on Effector CD4<sup>+</sup> T Cells and CD8<sup>+</sup> T Cells among* 115 *Spleen Lymphocytes*

116 The 11 N-linked glycans on LASV GP play an important role in GPC cleavage and maturation,  
117 as well as in pseudovirus infection. Additionally, N-glycosylation modification is involved in  
118 various aspects of the immune response to GPC, such as receptor recognition on the host cell

119 surface protecting LASV from the immune response (3, 4, 11-13).

120 Therefore, we focused on how modification of the 11 N-linked glycans on LASV GP  
121 influences the immune response to LASV GPC. We employed recombinant GPC plasmids with  
122 N to Q substitution as the DNA vaccine used to immunize BALB/c mice. BALB/c mice were  
123 immunized with 13 groups (6 mice per group) of DNA vaccines, including 11 groups of  
124 mutated recombinant plasmids, pCAGGS-GPC<sub>N-Q</sub>, WT GPC, and control pCAGGS.  
125 Immunofluorescence analyses of CD3, CD4, CD8, and interferon (IFN)- $\gamma$  were performed (Fig.  
126 3). The proportions of CD3+ T cells in spleen lymphocytes in 78 BALB/c mice across the 13  
127 vaccinated groups were within the range (~40%) of those observed during normal immune  
128 response, whereas the deletion of the 1<sup>st</sup>, 2<sup>nd</sup>, 4<sup>th</sup>, and 8<sup>th</sup> (N79Q, N89Q, N109Q, N365Q)  
129 glycans caused the proportion of CD3+ T cells to decrease slightly when compared to the WT  
130 (Fig. 3A). Moreover, abolishment of the 1<sup>st</sup>, 2<sup>nd</sup>, and 6<sup>th</sup> (N79Q, N89Q, N167Q) glycans caused  
131 the proportion of CD4+ T cells to decrease, whereas abolishment of the 5<sup>th</sup>, 9<sup>th</sup>, and 10<sup>th</sup>  
132 (N119Q, N373Q, N390Q) glycans led to the proportion of CD8+ T cells to increase (Fig. 3B  
133 and 3C).

134 Lymphocytes that secrete IFN- $\gamma$  represent an effector subset of these cells. First, we found  
135 that immunization with the WT resulted in a significant increase in the proportion of both the  
136 effector CD4+ and CD8+ cells relative to the control plasmid vaccine group. Moreover,  
137 deletion of the 1<sup>st</sup>, 3<sup>rd</sup>, 5<sup>th</sup> and 6<sup>th</sup> (N79Q, N99Q, N119Q, N167Q) N-linked glycans on GPC  
138 significantly enhanced the proportion of effector CD4+ cells, and deletion of the remaining  
139 seven N-sugar chains had no effect on their proportion. For CD8+ effector T cells, deletion of

140 the 1<sup>st</sup>, 2<sup>nd</sup>, 3<sup>rd</sup>, 4<sup>th</sup>, 5<sup>th</sup>, 6<sup>th</sup>, and 9<sup>th</sup> N-linked glycans enhanced their proportion relative to IFN- $\gamma$ ,  
141 and deletion of the 7<sup>th</sup>, 8<sup>th</sup>, 10<sup>th</sup>, and 11<sup>th</sup> N-linked glycans had no effect (Fig. 3D and E).

142

### 143 *Effects of N-linked Glycans on Cytokines Secreted by Spleen Lymphocytes*

144 Among the seven cytokines tested, interleukin (IL)-2, IFN- $\gamma$ , and tumor necrosis factor  
145 (TNF)- $\alpha$  are associated with the Th1-type cellular immune response, IL-4, IL-6, and IL-10 with  
146 the Th2-type response, and IL-17A to the Th17-type response. Fig. 4 shows that all seven  
147 cytokines, except for IL-17A, increased in WT group relative to control pCAGGS group.  
148 Specifically, deletion of the individual 3<sup>rd</sup> to 10<sup>th</sup> N-linked glycans on GPC significantly  
149 increased IL-2 levels in spleen lymphocytes relative to those in mice receiving WT GPC (Fig.  
150 4A), whereas deletion of the individual 3<sup>rd</sup>, 5<sup>th</sup>, 6<sup>th</sup>, 8<sup>th</sup>, 9<sup>th</sup>, and 10<sup>th</sup> glycan increased IFN- $\gamma$   
151 levels (Fig. 4B); TNF- $\alpha$  was only slightly elevated when either the 3<sup>rd</sup> or 9<sup>th</sup> glycans were  
152 abolished (Fig. 4C).

153 Furthermore, we found that deletion of the 1<sup>st</sup> and 5<sup>th</sup> N-linked glycans on GPC  
154 significantly increased IL-4 secretion, deletion of the 2<sup>nd</sup>, 3<sup>rd</sup>, 4<sup>th</sup>, and 8<sup>th</sup> slightly increased IL-4  
155 secretion, and deletion of the remaining five glycans had no effect (Fig. 4D). However, IL-6  
156 levels in either glycan mutation motif showed no significant difference relative to levels in the  
157 WT group (Fig. 4E). Furthermore, deletion of the 3<sup>rd</sup>, 5<sup>th</sup>, 7<sup>th</sup>, 8<sup>th</sup>, 9<sup>th</sup>, and 10<sup>th</sup> N-linked glycans  
158 slightly increased IL-10 levels, whereas deletion of the remaining five N-linked glycans had no  
159 effect (Fig. 4F).

160 When studying induction of the Th17-type immune response (Fig. 4G), we observed



161 elevated levels of IL-17A in spleen lymphocytes from mice in the 7<sup>th</sup>, 8<sup>th</sup>, and 10<sup>th</sup> deletion  
162 mutation groups relative to those in mice receiving the WT vaccine.

163 These results indicated that deletion of N-linked glycans on GPC, especially those at the 3<sup>rd</sup>,  
164 5<sup>th</sup>, 8<sup>th</sup>, and 9<sup>th</sup> sites, primarily enhanced the induction of both Th1 and Th2 immune response.  
165 Intriguingly, deletion of the 11th glycan on GPC had no effect on Th1, Th2, and Th17A immune  
166 response. These findings suggest these specific glycan chains assist LASV in escaping immune  
167 response by reducing host recognition of GPC and precluding induction of the immune  
168 response.

169

#### 170 *Effects of N-glycosylation Modification on Antibody Titers*

171 We then detected antibody titers obtained from the individual glycan deletion mutation  
172 immunized serum against each mutated GPC variant using cell-based ELISA. Fig. 5 shows that  
173 antibody titers in mice receiving mutated GPC variants as well as the WT GPC plasmid  
174 generally had a higher affinity for the glycan deletion mutant GPC than the WT GPC,  
175 suggesting that the glycans on LASV GPC might play a role in immune escape by shielding the  
176 epitope and thus making it inaccessible to antibodies. Evaluation of which N-glycosylation site  
177 affected antibody titers revealed that deletion of N-linked glycan at the 3<sup>rd</sup>, 5<sup>th</sup>, 6<sup>th</sup>, 8<sup>th</sup>, and 9<sup>th</sup>  
178 sites significantly increased the antibody titer. The titers obtained from these five groups could  
179 reach to approximately 17(-log<sub>2</sub>) whereas the titers from the remaining seven groups were  
180 approximately 15(-log<sub>2</sub>) (Fig 5A–L). Similarly, to compare the antibody titers when titrated  
181 with WT GPC, we found that deletion of the 3<sup>rd</sup>, 5<sup>th</sup>, 6<sup>th</sup>, 8<sup>th</sup>, and 9<sup>th</sup> N-linked glycans generated

182 significantly higher antibody titers than other deletion mutations as well as WT (Fig. 5M),  
183 thereby indicating a role for the 3<sup>rd</sup>, 5<sup>th</sup>, 6<sup>th</sup>, 8<sup>th</sup>, and 9<sup>th</sup> N-glycosylation sites in the GPC in  
184 immune escape and reduced humoral immune response by shielding key GPC epitopes.

185

### 186 *Effects of N-glycosylation Modification on Antibody Neutralization*

187 We then evaluated the neutralization ability of the serum against LASVpv infection (Fig. 6).  
188 Unfortunately, we found that the serum generated by both the WT GPC immunized group and  
189 each of the N-linked glycan deletion mutated variants showed minimal to no neutralizing effect  
190 to the LASVpv infection.

191

## 192 **Discussion**

193 In a variety of virions such as influenza A virus, human immunodeficiency virus, Ebola virus,  
194 etc., a glycan shield on the glycoprotein plays critical roles in the host immune response. The  
195 LASV GPC harbors 11 N-linked glycans that almost completely encapsulate the GPC.  
196 Therefore, modification of these chains represents a possible strategy for identifying the LASV  
197 immune-escape mechanism, given that these chains might shield key epitopes on the protein  
198 surface from immune recognition. We hypothesized that removal of these chains could expose  
199 the epitopes, thereby promoting host recognition and triggering of the immune response.

200 First, to investigate the role of the individual N-linked glycan in GPC expression and function,  
201 we found that using either stratagem to abolish the glycosylation motif, the deletion of the 2<sup>nd</sup>  
202 (N89NS) or the 8<sup>th</sup> (N365YS) glycan led to decreased GPC cleavage and pseudotype virus

203 infectivity. These results were in line with previous reports that commented on the importance  
204 of these two glycans in LCMV GPC function (14, 15). As the 2<sup>nd</sup> and 8<sup>th</sup> glycans are absolutely  
205 conserved in *Mammarenavirus* GPC, it was supposed that both of the glycan chains play  
206 essential roles in GPC expression and function (1, 12). The 2<sup>nd</sup> glycan was reported to interact  
207 with H92 in the prefusion conformation, and during endocytosis, the glycan chain was rotated  
208 and H92 was released, which could bind to the second receptor LAMP1 (1, 13). Similarly, the  
209 2<sup>nd</sup> glycan of the New World *Mammarenavirus* Machupo virus was reported to form a stacking  
210 interaction with F98, which was essential for receptor binding (12, 15). The 8<sup>th</sup> glycan of LASV  
211 GPC was the first glycan in GP2. This glycan was reported to interact with Q232 and R235,  
212 shielding the fusion peptide at the tip of GP2, and thus contributing to the stability of the  
213 prefusion GPC (1).

214 It was recently reported that the 3<sup>rd</sup> and 5<sup>th</sup> glycan on LASV GPC shield the neutralizing  
215 epitopes of the virus (4, 8), and the 5<sup>th</sup>, 8<sup>th</sup> and 9<sup>th</sup> glycosylation motifs were reported to be  
216 located in the epitopes of GPC (8). Most recently, the 10<sup>th</sup> and 11<sup>th</sup> glycans were reported to  
217 occlude the conformational GPC-B epitope located at the stalk of GPC (16). Notably, evidence  
218 from human survivor and vaccine development studies have shown that adaptive immune  
219 protection in LASV infection is probably conferred mainly by a cell-mediated immune response,  
220 especially for Type I IFN (9, 17-23). It was supposed that deletion of the glycan chain would  
221 expose the epitope and thus increase the immunogenicity of GPC. We found that deletion of  
222 specific N-linked glycan residues on the GPC had no effect on the proportions of lymphocytes  
223 (CD3+, CD4+/CD3+, and CD8+/CD3+) but significantly increased proportions of effector

224 lymphocytes (IFN- $\gamma$ + /CD4+ and IFN- $\gamma$ + /CD8+), especially following deletion of chains at the  
225 1<sup>st</sup>, 3<sup>rd</sup>, 5<sup>th</sup>, and 6<sup>th</sup> glycosylation sites. Additionally, we observed significant increases in the  
226 secretion of molecules involved in Th1 immune response (IL-2 and IFN- $\gamma$ ) following deletion  
227 of chains at the 3<sup>rd</sup>, 5<sup>th</sup>, 8<sup>th</sup>, 9<sup>th</sup>, and 10<sup>th</sup> glycosylation sites, although this did not affect the  
228 secretion of Th2- and Th17-related cytokines. These results support the role of N-linked glycans  
229 in inhibiting host recognition and Th1 immune response.

230 Additionally, analysis of changes in antibody titers from the sera of mice immunized with  
231 GPC variants revealed general increases in titer following glycan removal, suggesting that the  
232 presence of these glycan chains promotes immune escape by shielding the antigenic epitope.  
233 Moreover, we verified that the antibodies generated by all GPC variants showed no neutralizing  
234 effect on the WT LASVpv. This indicated that the epitopes exposed by the deletion of N-linked  
235 glycans on the GPC did not generate neutralizing antibodies, suggesting that further  
236 investigation is required to identify these LASV epitopes.

237 In summary, we found that the N-sugar chains at the 3<sup>rd</sup>, 5<sup>th</sup>, 6<sup>th</sup>, 8<sup>th</sup>, and 9<sup>th</sup> N-linked  
238 glycans likely shield epitopes on the LASV GPC that reduce host cellular and humoral immune  
239 responses. These sites can potentially be used as breakthrough points to develop effective  
240 therapeutic or prophylactic antibodies against Lassa fever.

241

## 242 **Materials and Methods**

### 243 *Cells and Plasmids*

244 HEK 293T, HeLa, and Vero cells were cultured in Dulbecco's modified Eagle's medium

245 (HyClone, Logan, UT, USA) supplemented with 10% fetal bovine serum (FBS, Gibco, Grand  
246 Island, NY, USA). The pseudotype VSV bearing the GPC of LASV (strain Josiah, GenBank  
247 accession number HQ688673.1) as well as containing the *Renilla* luciferase (Rluc) reporter  
248 gene were generated as previously reported with the titer of  $3 \times 10^7$ /mL (24).

249 To generate individual glycan deletion mutations, we introduced three amino acid  
250 substitutions (N→A, N→Q, and T/S→A) into the 11 N-glycosylation motifs using 33 pairs of  
251 primers (Table 1) (Synthesised by Sangon, Shanghai). The recombinant plasmids underwent  
252 PCR amplification to perform site-directed mutagenesis, after which the template was removed  
253 by *DpnI* restriction digestion, and products were obtained via gel extraction, transformation,  
254 and monoclonal antibody identification.

255

#### 256 *Mice*

257 Specific pathogen-free (SPF) 6-week-old female BALB/c mice were maintained at the  
258 Laboratory Animal Center of Wuhan Institute of Virology, Chinese Academy of Sciences (CAS).  
259 All mouse studies were performed according to Regulations of the Administration of Affairs  
260 Concerning Experimental Animals in China (WIVA25201801), and the protocols were  
261 reviewed and approved by the Laboratory Animal Care and Use Committee at the Wuhan  
262 Institute of Virology, CAS. All mice were fed in independent ventilated cages (IVCs), and the  
263 IVCs were kept within an SPF barrier environment for experimental animals. The feed was  
264 sterilized via  $\text{Co}^{60}$  irradiation and water was sterilized using an autoclave.

265

266 *Immunization Strategy*

267 Immunization was performed via intramuscular injection using 40 µg of each respective  
268 plasmid in the medial thigh of each mouse while avoiding blood vessels. To improve  
269 immunogenicity, mice were shocked with an Electro Square Porator (BTX, ECM830) using the  
270 cross method with the injection hole as the center. Six mice in each group were immunized  
271 three times over a 2-week interval, and at 10 days after the final immunization, mice were  
272 euthanized via decapitation; eyeball enucleation was conducted for blood collection.

273

274 *Separation of Mouse Spleen Lymphocytes*

275 Lymphocyte separation was performed using an EZ-Sep kit (Dakewe Biotech Co., Ltd., Beijing,  
276 China) according to manufacturer's instructions. Mouse spleen were soaked in Roswell Park  
277 Memorial Institute (RPMI) 1640 medium. EZ-Sep separation solution (3–4 mL) was then added  
278 to a sterile 3 cm culture dish, over which a nylon mesh was fixed with hemostatic forceps. The  
279 spleen were placed onto the mesh for grinding and grinding solution was rapidly transferred to  
280 a 15 mL centrifuge tube along with ~500 µL of serum-free RPMI 1640 along the tube wall; the  
281 solution was centrifuged at 800 g at 25 °C for 30 min. The lymphocyte layer was transferred to  
282 a new 15 mL centrifuge tube, followed by the addition of 10 mL serum-free RPMI 1640  
283 medium and centrifugation at 250 g for 10 min. The supernatant was then carefully removed,  
284 the cells were resuspended with 500 µL RPMI 1640 medium containing 10% FBS, and 10 µL  
285 was used for 10-fold serial dilutions for cell counting. The solution was diluted to a cell density  
286 of  $2 \times 10^7$  cells/mL, transferred to a 96-well U-shaped-bottom plate at 100 µL/well, and cultured

287 in a cell incubator with 5% CO<sub>2</sub> at 37 °C.

288

289 *Detection of CD4+ and CD8+ T Cells and Cytokines*

290 The culture system used to stimulate spleen lymphocytes involved the application of a  
291 stimulator and co-stimulator [(anti-CD28) + Golgi blocker (BFA) + spleen lymphocytes (2 ×  
292 10<sup>6</sup> cells)]. Negative control, positive control, and experimental groups underwent stimulation  
293 with phosphate-buffered saline (PBS), phorbol myristate acetate/ionomycin, and polypeptide  
294 (Table 2) (Synthesised by Bankpeptide, Heifei) (25), respectively. After 4.5 h in culture, the  
295 solution was centrifuged at 800 g for 3 min; 50 µL TruStain FcX™ (mouse anti-CD16/32;  
296 BioLegend, San Diego, CA, USA) was added to reduce non-specific fluorescent staining,  
297 incubated at 4 °C for 10 min, and centrifuged at 800 g for 3 min. PBS solution was then used to  
298 dilute fluorescently labeled antibodies (PE-conjugated rat anti-mouse CD8a, FITC-conjugated  
299 rat anti-mouse CD4, PE-Cy™7-conjugated hamster anti-mouse CD3e), and 7-AAD viability  
300 staining solution (BioLegend) by 1:200. They were then added (100 µL/well) for staining at  
301 4 °C for 20 min in the dark. After washing, the cells were fixed, permeabilized, and subjected to  
302 intracellular staining. An allophycocyanin-conjugated rat anti-mouse IFN-γ antibody (1:200)  
303 was then added and incubated at 4 °C for 30 min in the dark. The cells were filtered through a  
304 200 µm nylon mesh before being loaded onto the flow cytometer (BD FACSAria III).  
305 Cytokines were detected using a cytometric bead array kit (BD Biosciences, Franklin Lakes, NJ,  
306 USA) according to manufacturer's instructions.

307

308 *Antibody Titration*

309 The sera were collected from each immunized mouse 10 d after the last immunization to  
310 determine specific IgG using cell-based ELISA. The serum was diluted 50-fold, followed by  
311 separation into eight gradient dilutions at 1:4 ratios. HeLa cells were transfected with the  
312 individual glycan deletions with WT and control plasmids serving as antigens, which were  
313 blocked, washed, and incubated with serums, followed by detection with HRP-conjugated  
314 AffiniPure Goat Anti-Mouse IgG (Proteintech, Wuhan, China).

315

316 *Antibody Neutralization*

317 Serum was diluted 10-fold with FBS-free medium and then separated into six gradients at 1:2  
318 ratios. Forty microliters of the diluted serum were mixed with 10  $\mu$ L LASVpv at 37 °C for 1 h.  
319 The mixture was added to Vero cells for 1 h incubation. Neutralization activities were  
320 determined 24 hours later using the Rluc assay system (Promega, Madison, WI, USA).

321

322 **ACKNOWLEDGEMENTS**

323 We thank the Center for Instrumental Analysis and Metrology, Core Facility and Technical  
324 Support, and Center for Animal Experiment, Wuhan Institute of Virology, for providing  
325 technical assistance. We would like to thank Editage ([www.editage.cn](http://www.editage.cn)) for English language  
326 editing

327 This work was supported by the National Key Research and Development Program of China  
328 (2018YFA0507204), the National Natural Sciences Foundation of China (31670165), Wuhan



329 National Biosafety Laboratory, Chinese Academy of Sciences Advanced Customer Cultivation  
330 Project (2019ACCP-MS03), the Open Research Fund Program of the State Key Laboratory of  
331 Virology of China (2018IOV001).

332

### 333 REFERENCES

- 334 1. Hastie KM, Zandonatti MA, Kleinfelter LM, Heinrich ML, Rowland MM, Chandran K, Branco LM, Robinson  
335 JE, Garry RF, Saphire EO. 2017. Structural basis for antibody-mediated neutralization of Lassa virus.  
336 *Science* 356:923-928.
- 337 2. Eichler R, Lenz O, Garten W, Strecker T. 2006. The role of single N-glycans in proteolytic processing and  
338 cell surface transport of the Lassa virus glycoprotein GP-C. *Virology* 341:3-41.
- 339 3. Watanabe Y, Raghwani J, Allen JD, Seabright GE, Li S, Moser F, Huiskonen JT, Strecker T, Bowden TA,  
340 Crispin M. 2018. Structure of the Lassa virus glycan shield provides a model for immunological resistance.  
341 *Proc Natl Acad Sci U S A* doi:10.1073/pnas.1803990115.
- 342 4. Sommerstein R, Flatz L, Remy MM, Malinge P, Magistrelli G, Fischer N, Sahin M, Bergthaler A, Igonet S,  
343 Ter Meulen J, Rigo D, Meda P, Rabah N, Coutard B, Bowden TA, Lambert PH, Siegrist CA, Pinschewer DD.  
344 2015. Arenavirus Glycan Shield Promotes Neutralizing Antibody Evasion and Protracted Infection. *PLoS*  
345 *Pathog* 11:e1005276.
- 346 5. Johnson KM, McCormick JB, Webb PA, Smith ES, Elliott LH, King IJ. 1987. Clinical virology of Lassa fever in  
347 hospitalized patients. *J Infect Dis* 155:456-64.
- 348 6. Gunther S, Emmerich P, Laue T, Kuhle O, Asper M, Jung A, Grewing T, ter Meulen J, Schmitz H. 2000.  
349 Imported lassa fever in Germany: molecular characterization of a new lassa virus strain. *Emerg Infect Dis*  
350 6:466-76.
- 351 7. McCormick JB, King IJ, Webb PA, Scribner CL, Craven RB, Johnson KM, Elliott LH, Belmont-Williams R.  
352 1986. Lassa fever. Effective therapy with ribavirin. *N Engl J Med* 314:20-6.
- 353 8. Robinson JE, Hastie KM, Cross RW, Yenni RE, Elliott DH, Rouelle JA, Kannadka CB, Smira AA, Garry CE,  
354 Bradley BT, Yu H, Shaffer JG, Boisen ML, Hartnett JN, Zandonatti MA, Rowland MM, Heinrich ML,  
355 Martinez-Sobrido L, Cheng B, de la Torre JC, Andersen KG, Goba A, Momoh M, Fullah M, Gbakie M,  
356 Kanneh L, Koroma VJ, Fonnier R, Jalloh SC, Kargbo B, Vandi MA, Gbetuwa M, Ikponmwoosa O, Asogun DA,  
357 Okokhere PO, Follarin OA, Schieffelin JS, Pitts KR, Geisbert JB, Kulakowski PC, Wilson RB, Happi CT, Sabeti  
358 PC, Gevaio SM, Khan SH, Grant DS, Geisbert TW, Saphire EO, Branco LM, Garry RF. 2016. Most neutralizing  
359 human monoclonal antibodies target novel epitopes requiring both Lassa virus glycoprotein subunits.  
360 *Nat Commun* 7:11544.
- 361 9. Meulen J, Badusche M, Satoguina J, Strecker T, Lenz O, Loeliger C, Sakho M, Koulemou K, Koivogui L,  
362 Hoerauf A. 2004. Old and New World arenaviruses share a highly conserved epitope in the fusion domain  
363 of the glycoprotein 2, which is recognized by Lassa virus-specific human CD4+ T-cell clones. *Virology*  
364 321:134-43.

- 365 10. ter Meulen J, Badusche M, Kuhnt K, Doetze A, Satoguina J, Marti T, Loeliger C, Koulemou K, Koivogui L,  
366 Schmitz H, Fleischer B, Hoerauf A. 2000. Characterization of human CD4(+) T-cell clones recognizing  
367 conserved and variable epitopes of the Lassa virus nucleoprotein. *J Virol* 74:2186-92.
- 368 11. Bowden TA, Crispin M, Graham SC, Harvey DJ, Grimes JM, Jones EY, Stuart DI. 2009. Unusual molecular  
369 architecture of the machupo virus attachment glycoprotein. *J Virol* 83:8259-65.
- 370 12. Abraham J, Corbett KD, Farzan M, Choe H, Harrison SC. 2010. Structural basis for receptor recognition by  
371 New World hemorrhagic fever arenaviruses. *Nat Struct Mol Biol* 17:438-44.
- 372 13. Cohen-Dvashi H, Cohen N, Israeli H, Diskin R. 2015. Molecular Mechanism for LAMP1 Recognition by  
373 Lassa Virus. *J Virol* 89:7584-92.
- 374 14. Bonhomme CJ, Capul AA, Lauron EJ, Bederka LH, Knopp KA, Buchmeier MJ. 2011. Glycosylation  
375 modulates arenavirus glycoprotein expression and function. *Virology* 409:223-33.
- 376 15. Bonhomme CJ, Knopp KA, Bederka LH, Angelini MM, Buchmeier MJ. 2013. LCMV glycosylation modulates  
377 viral fitness and cell tropism. *PLoS One* 8:e53273.
- 378 16. Hastie KM, Cross RW, Harkins SS, Zandonatti MA, Koval AP, Heinrich ML, Rowland MM, Robinson JE,  
379 Geisbert TW, Garry RF, Branco LM, Saphire EO. 2019. Convergent Structures Illuminate Features for  
380 Germline Antibody Binding and Pan-Lassa Virus Neutralization. *Cell* 178:1004-1015 e14.
- 381 17. Ibukun FI. 2020. Inter-Lineage Variation of Lassa Virus Glycoprotein Epitopes: A Challenge to Lassa Virus  
382 Vaccine Development. *Viruses* 12.
- 383 18. Baize S, Marianneau P, Loth P, Reynard S, Journeaux A, Chevallier M, Tordo N, Deubel V, Contamin H.  
384 2009. Early and strong immune responses are associated with control of viral replication and recovery in  
385 lassa virus-infected cynomolgus monkeys. *J Virol* 83:5890-903.
- 386 19. Warner BM, Safronetz D, Stein DR. 2018. Current research for a vaccine against Lassa hemorrhagic fever  
387 virus. *Drug Des Devel Ther* 12:2519-2527.
- 388 20. Mire CE, Cross RW, Geisbert JB, Borisevich V, Agans KN, Deer DJ, Heinrich ML, Rowland MM, Goba A,  
389 Momoh M, Boisen ML, Grant DS, Fullah M, Khan SH, Fenton KA, Robinson JE, Branco LM, Garry RF,  
390 Geisbert TW. 2017. Human-monoclonal-antibody therapy protects nonhuman primates against advanced  
391 Lassa fever. *Nat Med* doi:10.1038/nm.4396.
- 392 21. Geisbert TW, Jones S, Fritz EA, Shurtleff AC, Geisbert JB, Liebscher R, Grolla A, Stroher U, Fernando L,  
393 Daddario KM, Guttieri MC, Mothe BR, Larsen T, Hensley LE, Jahrling PB, Feldmann H. 2005. Development  
394 of a new vaccine for the prevention of Lassa fever. *PLoS Med* 2:e183.
- 395 22. Botten J, Alexander J, Pasquetto V, Sidney J, Barrowman P, Ting J, Peters B, Southwood S, Stewart B,  
396 Rodriguez-Carreno MP, Mothe B, Whitton JL, Sette A, Buchmeier MJ. 2006. Identification of protective  
397 Lassa virus epitopes that are restricted by HLA-A2. *J Virol* 80:8351-61.
- 398 23. Fisher-Hoch SP, Hutwagner L, Brown B, McCormick JB. 2000. Effective vaccine for lassa fever. *J Virol*  
399 74:6777-83.
- 400 24. Wang P, Liu Y, Zhang G, Wang S, Guo J, Cao J, Jia X, Zhang L, Xiao G, Wang W. 2018. Screening and  
401 Identification of Lassa Virus Entry Inhibitors from an FDA-Approved Drugs Library. *J Virol* 92:e00954-18.
- 402 25. Vita R, Mahajan S, Overton JA, Dhanda SK, Martini S, Cantrell JR, Wheeler DK, Sette A, Peters B. 2019.  
403 The Immune Epitope Database (IEDB): 2018 update. *Nucleic Acids Res* 47:D339-D343.

404

405

406 **Figure legends**

407 Fig. 1. Proteolytic cleavage of the individual N-linked glycosylation motif mutants. (A)  
408 Schematic diagram and cartoon representation (PDB: 5VK2 (1)) of the glycosylation of  
409 LASV GPC. The precursor glycoprotein GPC was cleaved by SPase and SKI-1/S1P. The  
410 mature GPC contains SSP (1–58), GP1 (59–259), and GP2 (260–491) domains and is  
411 modified by 11 N-linked glycan chains. Transmembrane domains are indicated in gray. (B –  
412 D) HEK 293T cells expressing the wild-type GPC and individual N-glycosylation mutants of  
413 N→Q (B), N→A (C), and S/T→A (D), respectively. The expressed proteins were separated  
414 via SDS-PAGE and western blotting was carried out using anti-GP2 antisera. Images chosen  
415 are representative of at least three independent assays.

416 Fig. 2. The infectivities of pseudotype viruses bearing mutant GPC. The genome copies of the  
417 pseudotype viruses bearing the WT and mutant GPC were quantified using qPCR. Vero cells  
418 were infected with the WT and mutant viruses with the same genome copies and the Rluc  
419 were determined 24 hours later. Data are presented as mean  $\pm$  SD of at least 3 independent  
420 assays. \*P < 0.05, \*\*P < 0.01, compared to WT.

421 Fig. 3. Effects of N-glycan deletion on T cells in spleen lymphocytes. The mouse spleen  
422 lymphocytes were separated, cultured, and stained with phycoerythrin (PE)-conjugated rat  
423 anti-mouse CD8a, fluorescein isothiocyanate-conjugated rat anti-mouse CD4, PE–  
424 CyTM7-conjugated hamster anti-mouse CD3e, and 7-AAD viability staining solution  
425 (BioLegend) at 4°C for 20 min in the dark. (A–C) Effects of individual N-glycosylation  
426 deletions on CD3+ (A), CD4+ (B), and CD8+ (C) T cells in spleen lymphocytes. Effector T  
427 cells CD4+ (D) and CD8+ (E) T cells were stained with allophycocyanin-conjugated rat

428 anti-mouse IFN- $\gamma$  antibody (1:200). Each group contained five – six mice. \*P < 0.05, \*\*P <  
429 0.01, \*\*\*P < 0.001, compared to WT.

430 Fig. 4. Effects of N-glycan deletions on cytokines secreted by spleen lymphocytes were  
431 labeled by using a cytometric bead array kit (BD Biosciences), and IL-2 (A), IFN- $\gamma$  (B),  
432 TNF- $\alpha$  (C), IL-4 (D), IL-6 (E), IL-10 (F), and IL-17A (G) were determined using flow  
433 cytometry. Each group contained five – six mice. \*P < 0.05, \*\*P < 0.01, \*\*\* P < 0.001,  
434 compared to WT.

435 Fig. 5. Antibody response to N-glycan deletion GPC showed higher titer to mutant GPC than  
436 to WT GPC. After three rounds of immunization, sera were collected and the titers were  
437 determined using cell-based ELISA. \*P < 0.05, \*\*P < 0.01, \*\*\*P < 0.001, compared to WT.

438 Fig. 6. N-glycan deletions showed little effect in improving the neutralization ability of the  
439 antibody from sera against the seven individual glycan deletions in GP1 (A) and four in GP2  
440 (B).

441

442

Table 1. Primers for the mutagenesis.

|                     | N→Q                                                                              | N→A                                                                              | S/T→A                                                                                           |
|---------------------|----------------------------------------------------------------------------------|----------------------------------------------------------------------------------|-------------------------------------------------------------------------------------------------|
| N <sub>79</sub> MT  | AACATGGAGACTC <u>CAA</u> ATGACCATGC<br><u>TTGG</u> AGTGTCTCCATGTTAGTTCAG         | AACATGGAGACTC <u>GCC</u> ATGACCATGC<br><u>GGCG</u> AGTGTCTCCATGTTAGTTCAG         | GGAGACTCAATATGG <u>CC</u> ATGCCTCTCTC<br><u>GGCC</u> ATATTGAGTGTCTCCATGTTAGTTC                  |
| N <sub>88</sub> NS  | CTCTCTGCACAAAG <u>CAA</u> ACAGTCATC<br><u>TTGCT</u> TTGTGCAGGAGAGAGGCATGGT       | CTCTCTGCACAAAG <u>GCC</u> AACAGTCATC<br><u>GGCCT</u> TTGTGCAGGAGAGAGGCATGGT      | TGCACAAAGAACAAC <u>GCT</u> CATCATT<br><u>AGCG</u> TTGTTCTTTGTGCAGGAGAGA                         |
| N <sub>99</sub> ET  | ATATAATGGTGGG <u>C</u> AGAGACAGGA<br><u>TTGG</u> CCCCACCATTATATAATGATGACT        | ATATAATGGTGGG <u>GCC</u> GAGACAGGA<br><u>GGCG</u> CCCCACCATTATATAATGATGACT       | TAATGGTGGGCAATGAG <u>GC</u> AGGACTAGAAC<br><u>TGCT</u> CATTGCCACCATTATATAATGATGAC               |
| N <sub>109</sub> TS | GAACTGACCTTGAC <u>CA</u> ACGAGCATT<br><u>TTGG</u> GTCAAGGTCAGTTCTAGTCCTGT        | GAACTGACCTTGAC <u>GCC</u> ACGAGCATT<br><u>GGCG</u> GTCAAGGTCAGTTCTAGTCCTGT       | GACCTTGACCAACACG <u>GC</u> CATTATTAATCAC<br><u>GGCC</u> GTGTTGGTCAAGGTCAGTTCTAGTCC              |
| N <sub>119</sub> LS | ATCACAAATTTTG <u>C</u> CAACTGTCTGATG<br><u>TTGG</u> CAAAATTTGTGATTAATAATGCT      | ATCACAAATTTTG <u>GCC</u> CTGTCTGATG<br><u>GGCG</u> CAAAATTTGTGATTAATAATGCT       | CAAATTTGCAATCTG <u>GCT</u> GATGCCACAA<br><u>AGCC</u> CAGATTGCAAAATTTGTGATTAATAATG               |
| N <sub>167</sub> LS | TTAGTGTGCAGTAC <u>CA</u> ACTGAGTCACA<br><u>TTGG</u> TACTGCACACTAATCTTTCCCCA      | TTAGTGTGCAGTAC <u>GCC</u> CTGAGTCACA<br><u>GGCG</u> TACTGCACACTAATCTTTCCCCA      | TGTGCAGTACAACCTG <u>GC</u> TCACAGCTATGC<br><u>AGCC</u> CAGTTGTACTGCACACTAATCTTTCCC              |
| N <sub>224</sub> TT | TATCTGATAATCCA <u>CA</u> ACAACCTGGG<br><u>TTGT</u> TGGATTATCAGATATTGATAACT       | TATCTGATAATCCA <u>GCC</u> ACAACCTGGG<br><u>GGCT</u> TGGATTATCAGATATTGATAACT      | GATAATCCAAAATACAG <u>CC</u> TGGGAAGATC<br><u>GGCT</u> GTATTTGGATTATCAGATATTGATA                 |
| N <sub>385</sub> YS | GGAATTCATACTGT <u>CA</u> ATACAGCAAGT<br><u>TTGAC</u> AGTATGGAATTCATGATGTCC       | GGAATTCATACTGT <u>GCC</u> TACAGCAAGT<br><u>GGC</u> ACAGTATGGAATTCATGATGTCC       | CCATACTGTAATTAC <u>GC</u> CAAGTATT<br><u>GGCG</u> TAAATACAGTATGGAATTC                           |
| N <sub>373</sub> HT | AAGTATTGGTACCTC <u>CA</u> ACACACAATA<br><u>TTGG</u> AGGTACCAATACTTGCTGTA         | AAGTATTGGTACCTC <u>GCC</u> CACACAATA<br><u>GGCG</u> AGGTACCAATACTTGCTGTA         | TTGGTACCTCAACCAC <u>GC</u> A <sup>2</sup> ACTACTGGGAG<br><u>TGC</u> GTGGTTGAGGTACCAATACTTGCTGTA |
| N <sub>390</sub> GS | AATGTTGGCTTGATC <u>CA</u> AGGTTTCATACT<br><u>TTGT</u> GATACAAGCCAACATTTGGGCAGTGA | AATGTTGGCTTGATC <u>AGCC</u> GTTTCATACT<br><u>GGCT</u> GATACAAGCCAACATTTGGGCAGTGA | GCTTGATCAAATGGT <u>GC</u> A <sup>2</sup> ACTTGAACG<br><u>TGC</u> ACCATTTGATACAAGCCAACATTTGG     |
| N <sub>395</sub> ET | AATGGTTCATACTTG <u>CA</u> AGAGACCCACT<br><u>TTGC</u> AAGTATGAACCATTTGATACAAGC    | AATGGTTCATACTTG <u>GCC</u> GAGACCCACT<br><u>GGCC</u> AAGTATGAACCATTTGATACAAGC    | TTCATACTGAACGAG <u>GC</u> CACTTTTCTG<br><u>GGCC</u> TGTTCAAGTATGAACCATTTGATAC                   |

Table 2. Simulation peptides (predicted by [www.iedb.org](http://www.iedb.org))

|    | location | sequencing      | purity |
|----|----------|-----------------|--------|
| P1 | 277-285  | GYCLTRWML       | 95%    |
| P2 | 128-136  | LYDHALMSI       | 95%    |
| P3 | 65-73    | VYELQTLEL       | 95%    |
| P4 | 315-323  | LFDFNKQAI       | 95%    |
| P5 | 156-164  | DFNGGKISV       | 95%    |
| P6 | 322-336  | AIQRLKAEAQMSIQL | 95%    |

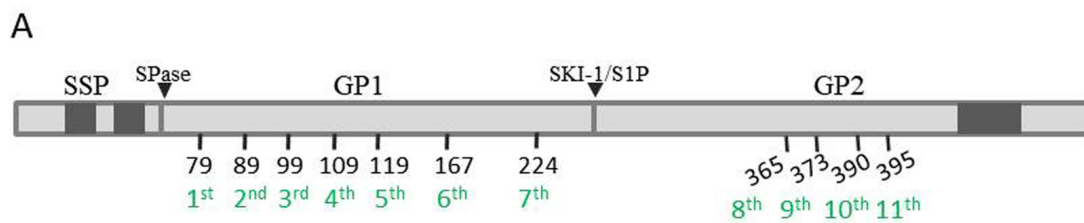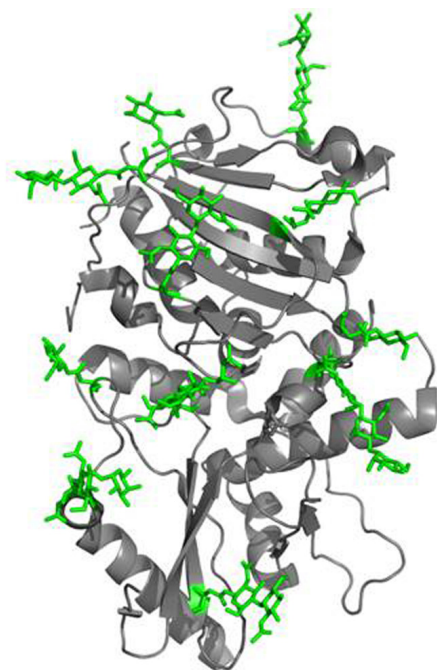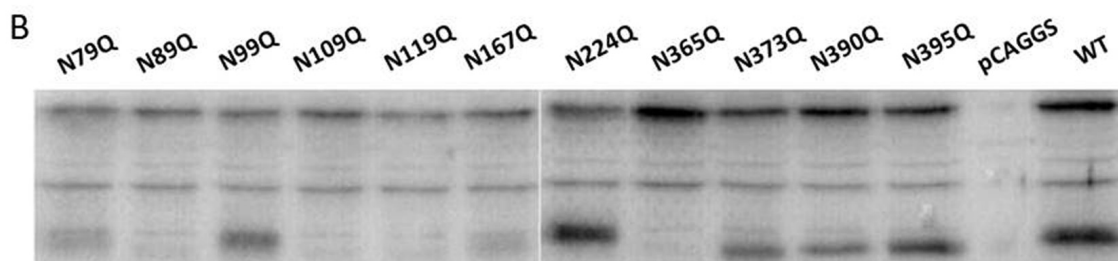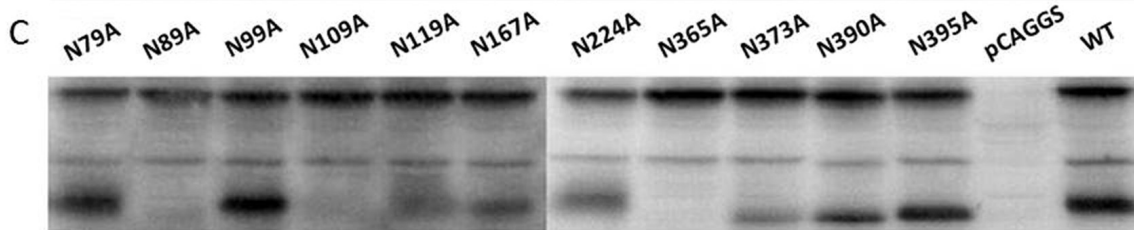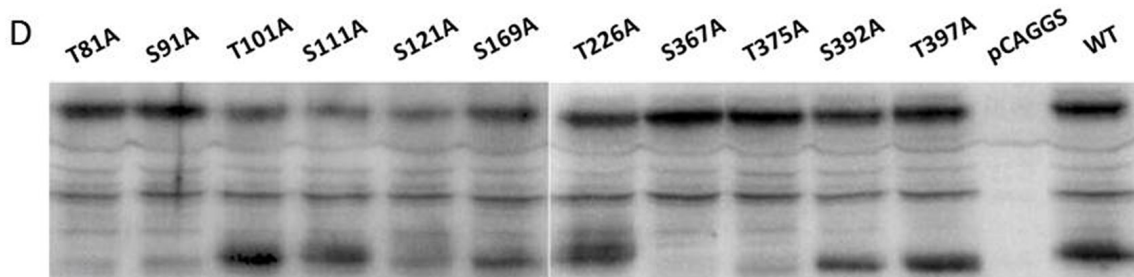

# N to Q

pseudotype virus infection  
(percentage of WT, %)

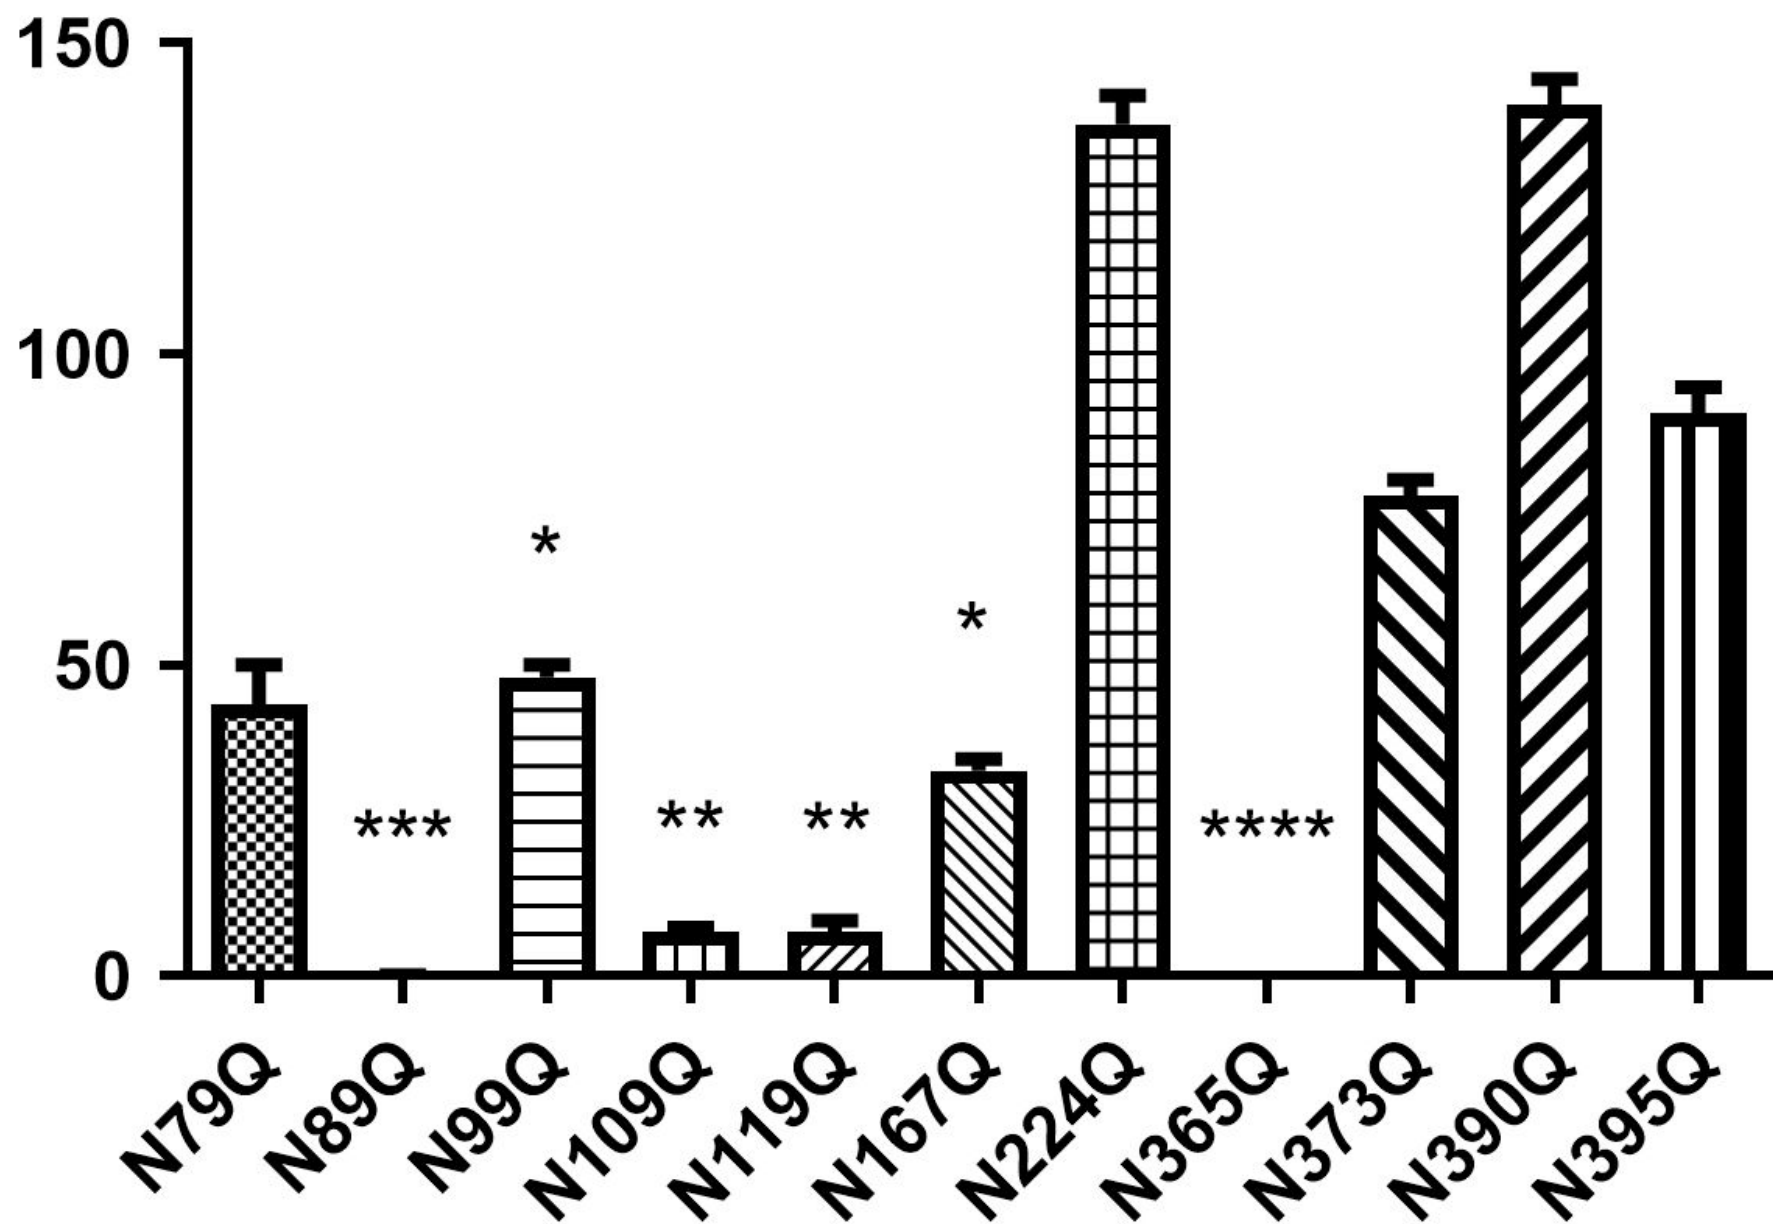



A

CD3<sup>+</sup>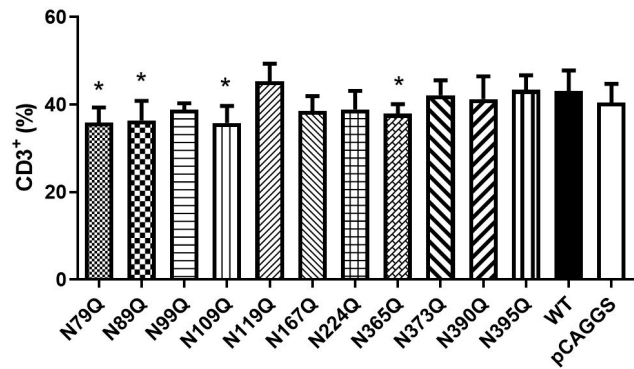

B

CD4<sup>+</sup>/CD3<sup>+</sup>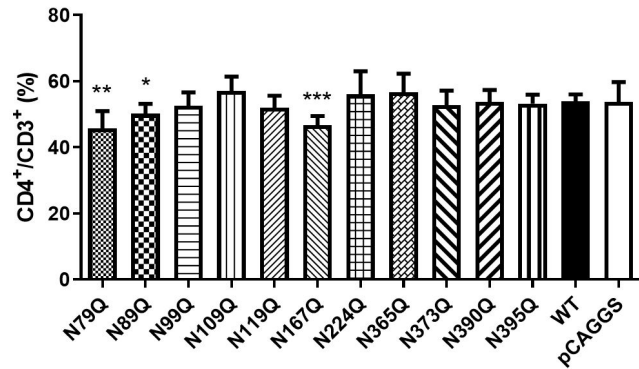

C

CD8<sup>+</sup>/CD3<sup>+</sup>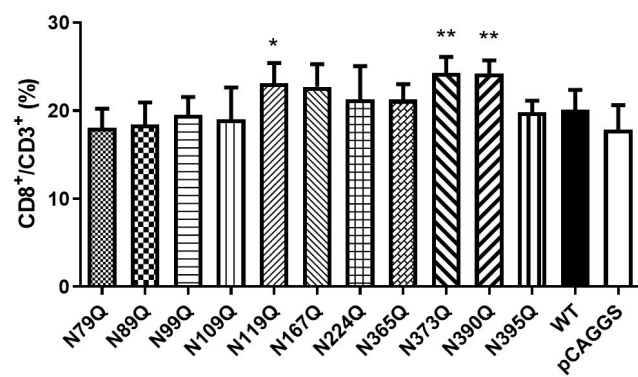

D

IFN- $\gamma$ /CD4<sup>+</sup>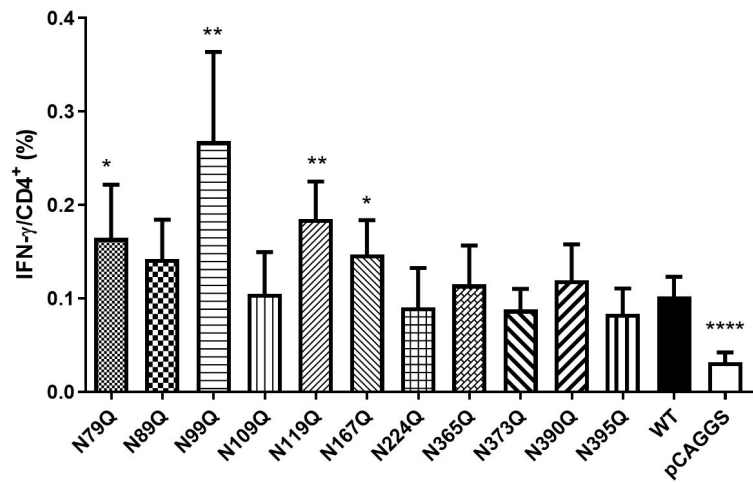

E

IFN- $\gamma$ /CD8<sup>+</sup>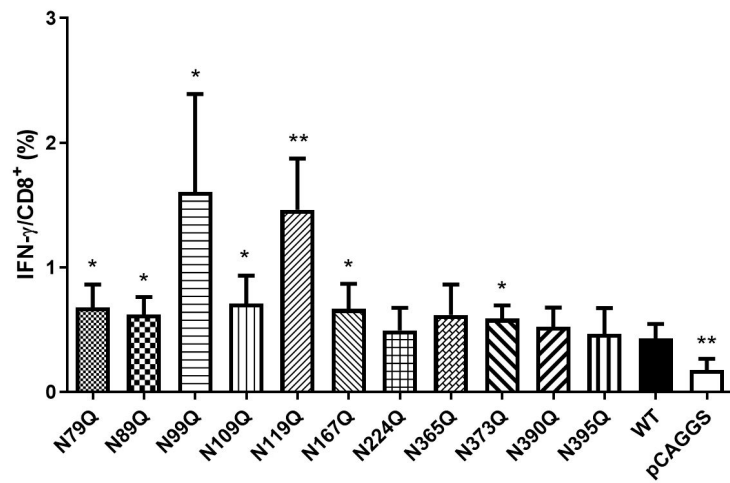

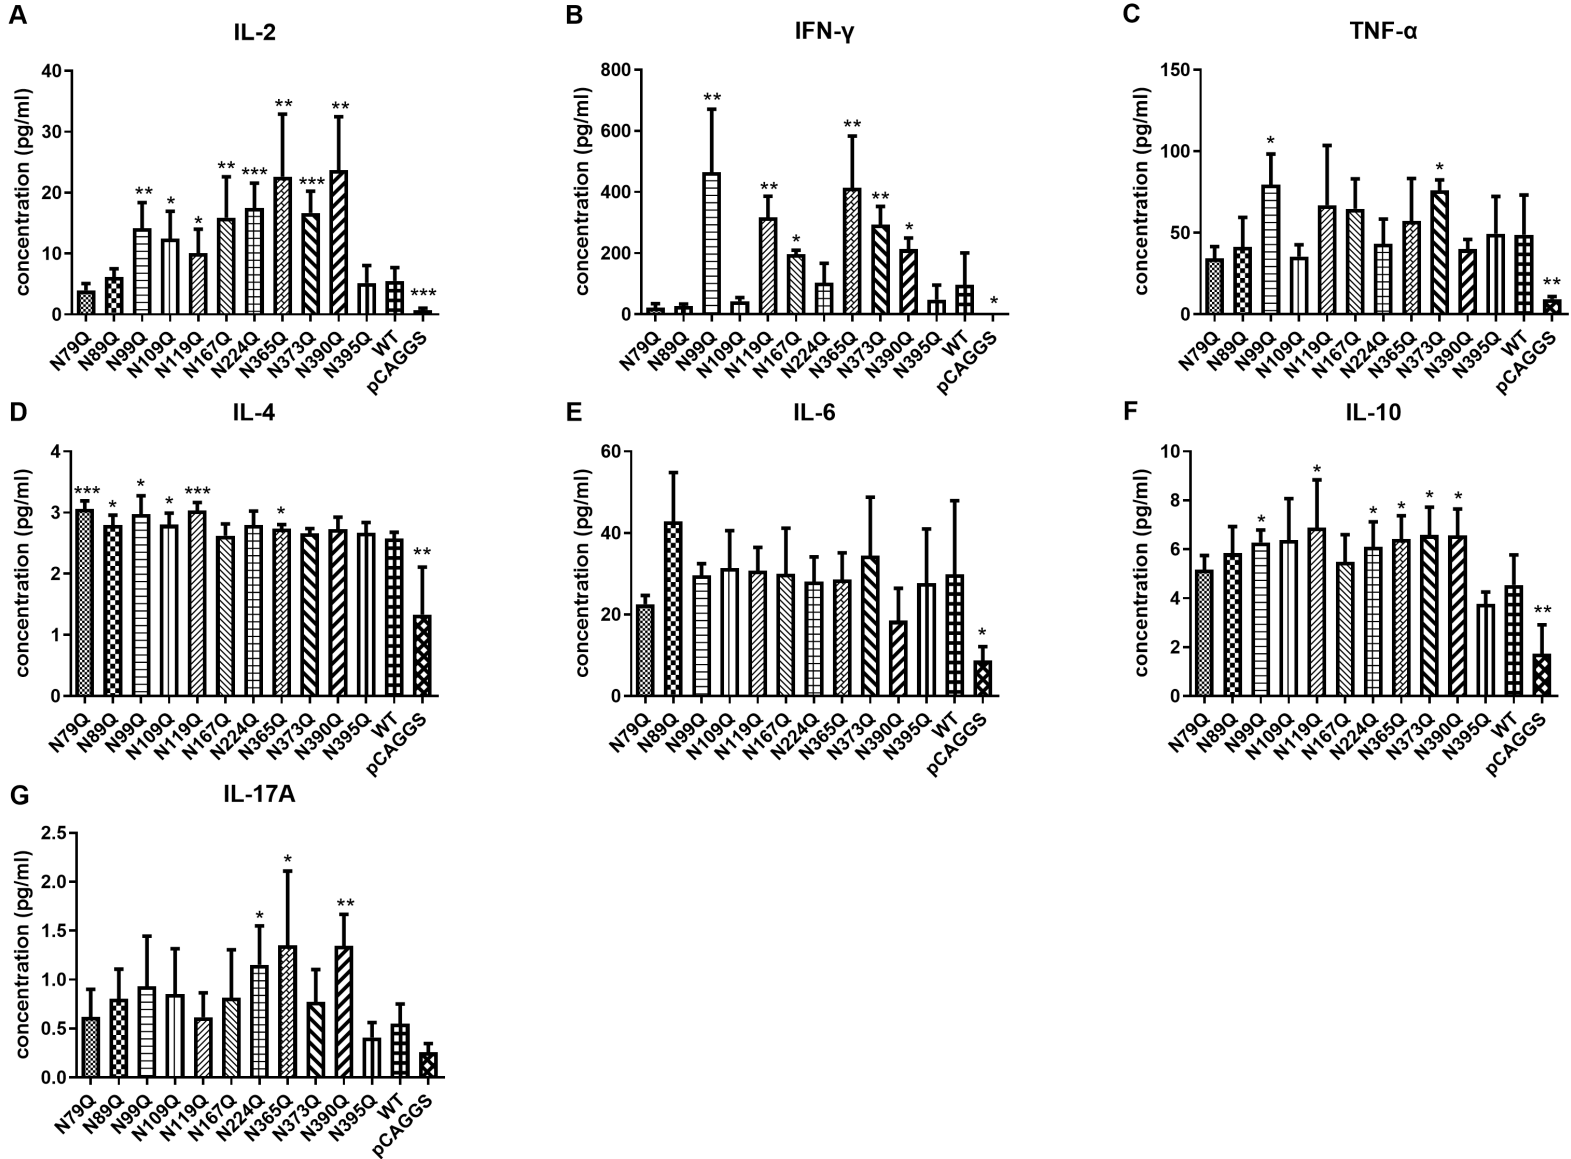

A

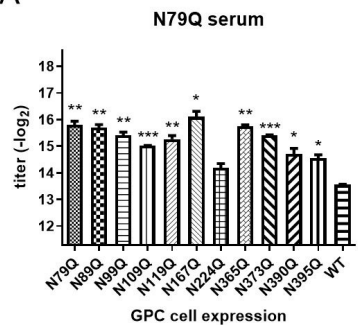

B

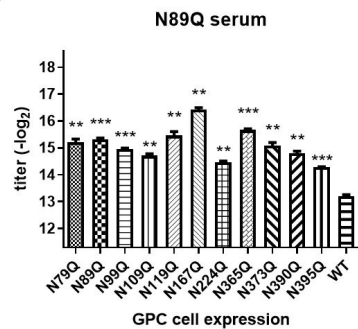

C

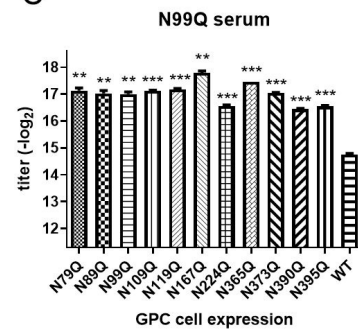

D

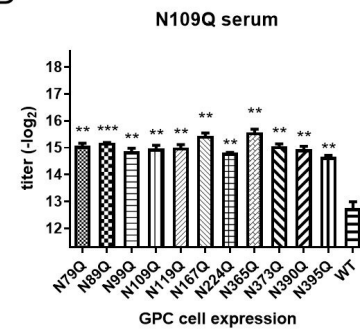

E

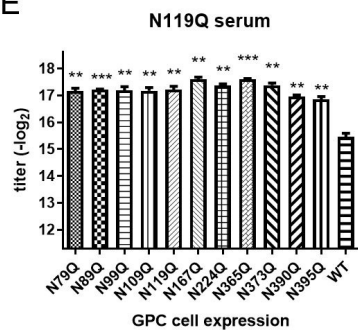

F

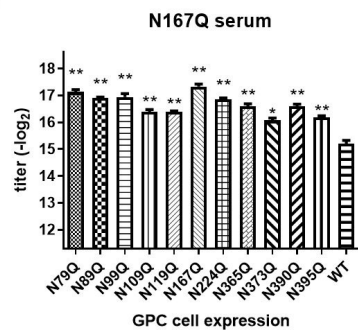

G

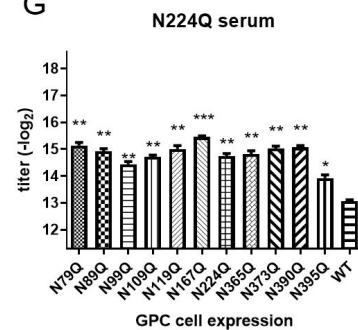

H

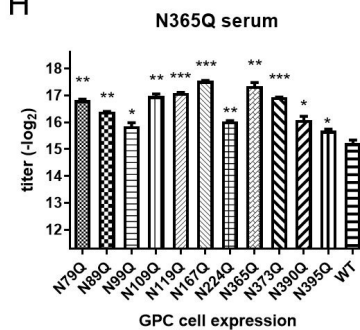

I

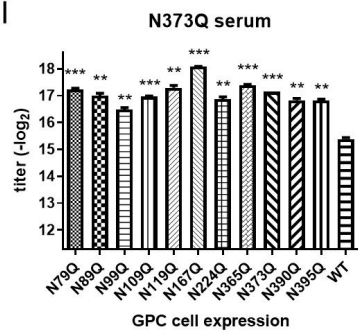

J

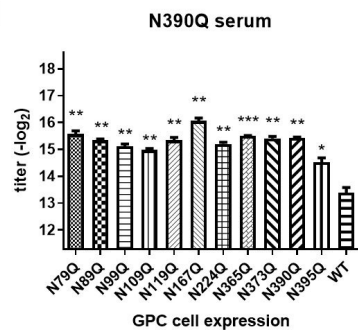

K

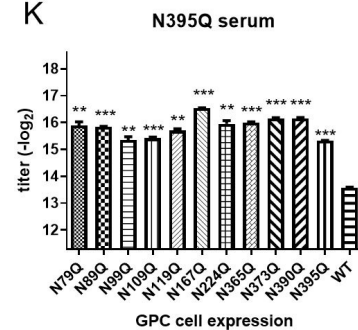

L

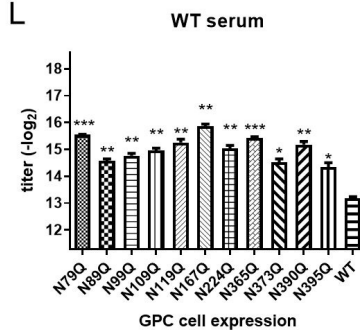

M

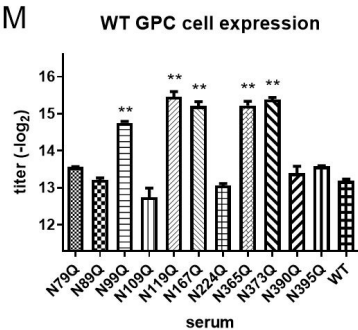

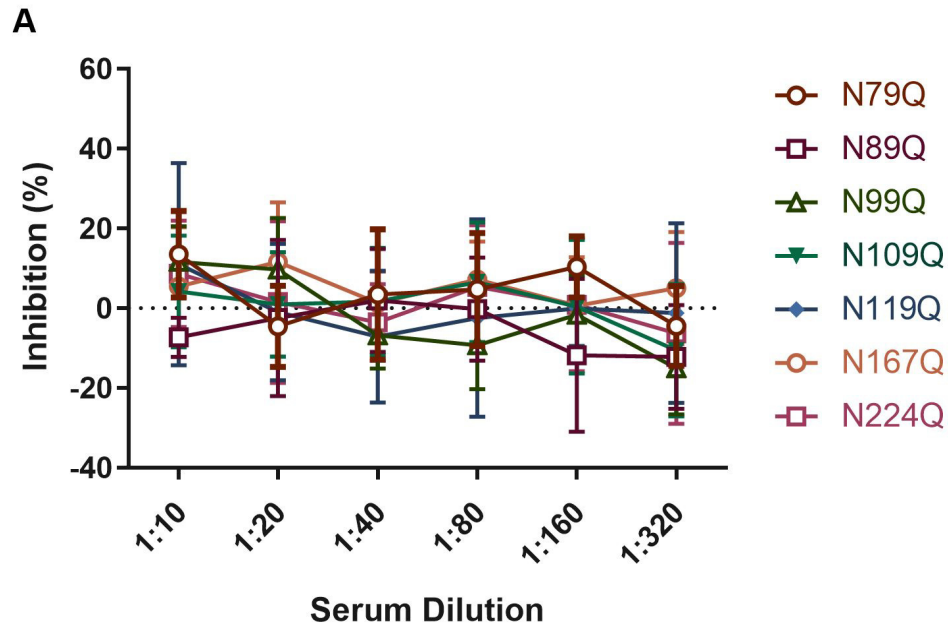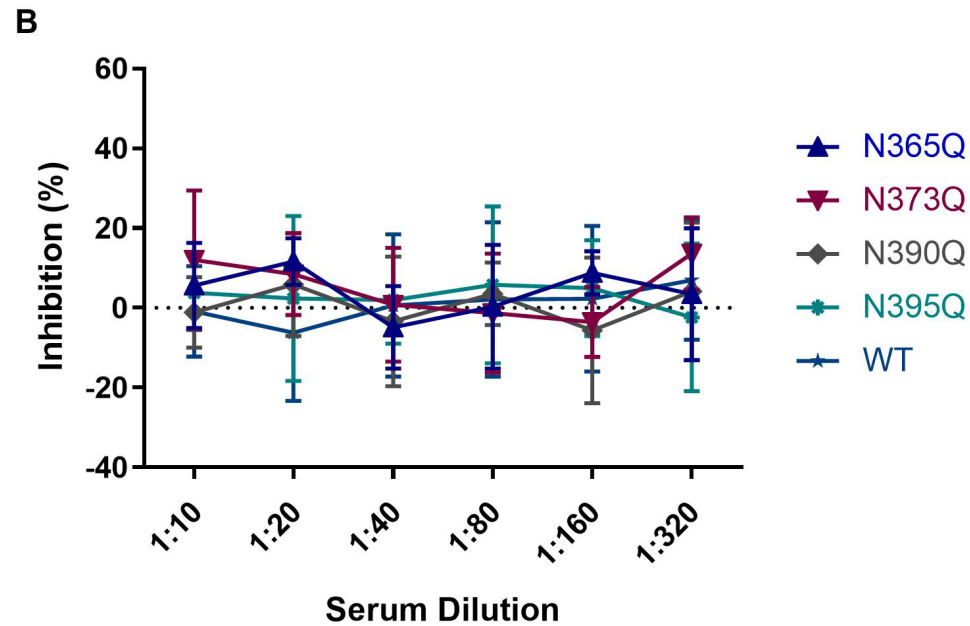

Source: https://www.biorxiv.org/content/10.1101/2020.09.29.319855v1.full.pdf
